1 **The geometry of dependence: solitary bee larvae prioritize carbohydrate over protein in**  
2 **parentally provided pollen**

3

4

5 **Alexander J. Austin<sup>1†</sup> and James D. J. Gilbert<sup>1</sup>**

6

7 **<sup>1</sup>School of Environmental Sciences, University of Hull, UK**

8 **<sup>†</sup>To whom correspondence should be addressed. Email: [a.austin@2015.hull.ac.uk](mailto:a.austin@2015.hull.ac.uk)**

9

## 10 Abstract

- 11 1. Bees, important pollinators, have declined significantly in recent decades, and human-  
12 induced changes to nutritional landscapes are partly responsible. Changes to nutritional  
13 quality rather than quantity have been overlooked as a threat to bee health. Yet  
14 knowledge of bee nutrition is currently largely restricted to adults of social species.  
15 Larval stages, where most growth occurs, are relatively understudied - perhaps because  
16 most social bees provision progressively and collectively, making nutrition difficult to  
17 trace.
- 18 2. In mass-provisioning solitary bees (*Osmia bicornis* L.), we can manipulate and follow  
19 larval nutrition, and thereby determine effects of changes in diet quality. Under the  
20 Geometric Framework for Nutrition, we restricted larvae to 6 diets: 3  
21 protein:carbohydrate ratios and 2 nutrient concentrations. We asked: (a) which diets  
22 maximise body size and survival, (b) what consumption rules do larvae follow when  
23 nutrients are imbalanced? Finally, (c) given a choice of complementary diets, are larvae  
24 able to select a dietary balance?
- 25 3. Larvae pupated after consuming a fixed carbohydrate amount, but tolerated a wide range  
26 of protein. Body size and survival were maximised on our lowest P:C ratio diet, and  
27 having consumed the most carbohydrate. When eating freely from two diets, larvae  
28 converged on a P:C ratio of 1:1.8, but not an overall nutrient intake target. Nevertheless,  
29 larvae maintained stable carbohydrate intake, while protein intake varied with the  
30 available diet.
- 31 4. Our results suggest solitary bee larvae regulate carbohydrate most closely, but that  
32 excessive indigestible material may limit their actual nutrient intake. Carbohydrate may

33           be critical to overwinter survival, and/or may be more limiting than protein. The large  
34           variation in protein tolerated, despite its importance, suggests bee larvae may be  
35           vulnerable to landscape changes - and therefore reliant on parents to regulate protein.  
36           Given the mixed evidence on whether parents can sense pollen protein content, our  
37           results highlight bees' potential vulnerability to a "nutritional trap", i.e. where rapid  
38           changes in their nutritional environment outstrip their evolved capacity to detect those  
39           changes, impairing their fitness.

40

41   Keywords: pollination, foraging ecology, agriculture, nutritional geometry, limiting nutrient,  
42   diapause, ecological trap, environmental change, bee health

## 43 **Introduction**

44 Bees are critical not only to global ecological stability but also to humans' food security,  
45 as major pollinators for 90% of the world's food crops (Klein et al., 2018, 2007; Potts et al.,  
46 2016) and many wildflowers (Ollerton et al., 2011). Many wild and domesticated bees have seen  
47 marked declines in recent decades, with both significant range contractions and extinctions  
48 (Ollerton et al., 2014). Honeybees have suffered huge losses across Europe and North America  
49 (Hayes et al., 2008; Potts et al., 2010) and wild bees have similarly struggled (Wood et al.,  
50 2016). These declines have been driven by a suite of reasons including, amongst others,  
51 nutritional stress (Goulson et al., 2015; Roulston and Goodell, 2011). Nutritional stress suffered  
52 by bees is mainly driven by human induced changes (Robertson et al., 2013), causing rapid  
53 changes to floral diversity, quantity and quality (Goulson et al., 2015; Robinson and Sutherland,  
54 2002; Ziska et al., 2016). In particular, agriculture, and the spread of intensive practices  
55 specifically, has severely altered the floral landscape, with farmland often supporting lower floral  
56 diversity (Letourneau et al., 2011; Poggio et al., 2013). Agriculture also affects temporal  
57 availability, with mass-flowering crops creating brief, monotonous gluts of food followed by  
58 periods of resource scarcity (Goulson and Nicholls, 2016). This change in the quantity of  
59 nutrition is a common attribute of human-altered systems; however, a largely under-recognised  
60 risk for global ecosystems is the wholesale change in *quality* of nutrition, rather than just  
61 quantity (Ziska et al., 2016). A change in nutritional quality could be of particular concern for  
62 bee larvae, as their diet, pollen, varies widely in nutrient content (Roulston and Cane, 2000a),  
63 with recent studies also showing changes in pollen nutrient content within plant species due to  
64 environmental change (Ziska et al., 2016). Wholesale changes to the nutritional quality of  
65 landscapes are of critical concern, as nutrition mediates animals' ability to grow, reproduce, and

66 maintain themselves (Simpson and Raubenheimer, 2012a). Understanding how animals cope in a  
67 changing nutritional environment requires us to understand not only how animals gather the  
68 correct balance of nutrients they need, but also how they adjust their foraging when resources are  
69 imbalanced (Simpson and Raubenheimer, 2012b).

70 In bees, the larval stage is where almost all growth occurs (Nijhout et al., 2014) as well as  
71 resource accumulation for diapause (Giejdasz and Wasielewski, 2017) - the way larval bees  
72 behave in the face of variable nutrition may be critical for bee health generally. Thus, bee  
73 nutrition research should focus on larvae at least as much as on adults. Unfortunately, we know  
74 relatively little about the nutritional ecology of most bee species, whether as larvae or adults  
75 (Roulston and Cane, 2002; Vanderplanck et al., 2014), with findings generally restricted to the  
76 latter. Findings in adult bees cannot necessarily be applied to their larvae; larval bees have a  
77 distinctly different diet to adults, adults primarily feeding on nectar (although see Cane, 2016)  
78 and larvae feeding almost solely on pollen (Muth et al., 2016).

79 The Geometric Framework for Nutrition (GF) allows us to investigate foraging decisions  
80 made by animals in multi-dimensional “nutrient space” (Simpson and Raubenheimer, 2012b,  
81 1993). The GF can be used to determine an organism’s intake target (the optimal amount and  
82 balance of macronutrients that an animal should aim to consume in order to achieve maximal  
83 fitness (Simpson and Raubenheimer, 1993) as well as how that target is achieved. Additionally,  
84 we can use the GF to investigate the *rule of compromise* - that is, the rules governing  
85 consumption that an animal uses when it is unable to reach its intake target with the nutritional  
86 options available (e.g. Lee et al., 2004b; Simpson and Raubenheimer, 2001).

87 The GF has provided profound insights into broad topics from ant agriculture (Shik et al.,  
88 2016) to human obesity (Simpson and Raubenheimer, 2005). While the GF has been used to

89 investigate the nutrition of some highly social hymenopterans (Arganda et al., 2014; Dussutour  
90 and Simpson, 2009, 2008), including bees (Altaye et al., 2010; Archer et al., 2014; Paoli et al.,  
91 2014a; Stabler et al., 2015; Vaudo et al., 2016), those studies have focused almost invariably on  
92 adults rather than larvae (although see Helm et al., 2017). It is extremely difficult to investigate  
93 larval nutrition in social species, principally because it is rarely possible to accurately track  
94 nutrition within a colony - food brought in by workers is often shared and/or modified within the  
95 nest, and is then continually fed to the larvae (Field, 2005). This means that nutritional insights  
96 from GF studies into the parent-offspring relationship are currently limited.

97         In solitary bees, by contrast, typically each reproductive female provisions each of her  
98 offspring individually with a single, independent “pollen ball” before sealing the cell and  
99 leaving. This pollen ball contains all the resources that the larva will need to grow to adulthood.  
100 This behaviour makes solitary bees a far better model for larval nutritional studies, and studies of  
101 parental provisioning, than social species - once the female has left, both larva and pollen ball  
102 can be manipulated, and larval development monitored.

103         In this study, we used a commercially important solitary bee species, *Osmia bicornis*, to  
104 investigate how larval bees cope with varying nutrition: different diets, and different diet  
105 choices. Bee larvae are typically entirely sedentary and parents supply all their nutritional  
106 demands (Field, 2005). Yet we have little knowledge about whether parent bees consistently  
107 provide offspring with a ready-balanced diet, whether pollen ball composition varies passively  
108 with the flowers available to foraging adults in the landscape, or somewhere in between. Adults  
109 forage in a heterogenous nutritional environment, but we know that, despite this, honeybee  
110 foragers are nevertheless able to collect food that balances out deficiencies in colony nutrients

111 (Hendriksma and Shafir, 2016). In general, though, evidence is scarce and mixed on whether  
112 adult bees can directly detect pollen quality at the flower (Nicholls and Hempel de Ibarra, 2016).

113         Given that parents may bring pollen of variable quality, the question of whether offspring  
114 are able to regulate their own nutrition to compensate for deficiencies in their provisions is a  
115 fundamental, but overlooked, component of bee nutrition. Even if parents cannot provide  
116 consistently balanced nutrition, larvae may still be able to eat selectively in order to achieve a  
117 nutritional target. Such regulation has been demonstrated in other insect larvae that develop  
118 independently of parents (Lee et al., 2002; Merx-Jacques et al., 2008) but is unstudied in bees.

119         We used a classic GF design (Jensen et al., 2012) with two experimental phases: in the  
120 first “no-choice” phase we raised *O. bicornis* larvae on fixed diets of differing protein to  
121 carbohydrate (P:C) ratios (two macronutrients regarded as critical to insects; Behmer, 2009;  
122 Clissold and Simpson, 2015; Huang, 2012; Scriber and Slansky, 1981) in order to determine  
123 their rules of compromise and the diet composition that maximised fitness. In a second “choice”  
124 phase, we then provided larvae with targeted choices between sets of two imbalanced diets that  
125 differed in their P:C ratios to determine whether larvae consistently aim for an intake target.  
126 Sterile adult workers of some social insect species have been shown to have carbohydrate-biased  
127 intake targets (Paoli et al., 2014a; Stabler et al., 2015); however, we focus here on the growing  
128 larvae of *O. bicornis*, whose adults are all reproductive. Given the traditionally assumed  
129 importance of protein for growth and reproduction in insects and animals generally (Chapman  
130 and Chapman, 1998; Simpson and Raubenheimer, 2012a), we predicted (1) that protein would be  
131 a key driver of fitness in larval *O. bicornis*, (2) that larvae would accordingly aim for a relatively  
132 protein-biased intake target, and (3) that larvae would prioritize protein intake over carbohydrate  
133 in their rule of compromise. Alternatively, among bees such as *Osmia* that undergo diapause

134 over winter, carbohydrate may also be important in building up sufficient fat reserves for  
135 overwinter survival (Arrese and Soulages, 2010; Giejdasz and Wasielewski, 2017).

136

## 137 **Methods**

138

### 139 *Study organism*

140 *Osmia bicornis* is a common, univoltine, cavity-nesting solitary bee native to Europe  
141 (Falk, 2015), and a commercially important pollinator of multiple crops (Jauker et al., 2012;  
142 Schulze et al., 2012). It is polylectic, feeding from a wide variety of flowers, and flies from  
143 March to July with males emerging a few weeks prior to females (Falk, 2015). Females nest in a  
144 variety of pre-existing cavities but can also be encouraged to nest in artificial constructs (Strohm  
145 et al., 2002).

146 All brood care in bees is performed by the female (Field, 2005) and *O. bicornis* larvae are  
147 entirely dependent on the food supply provided by their mother (Seidelmann et al., 2010) who  
148 builds a ball of pollen upon which she lays an egg. These provisions are stored in linear mud-  
149 lined cells each containing a single larva with each larva receiving a pollen provision directly  
150 from the mother.

151

### 152 *Study population*

153 *O. bicornis* larvae were obtained as diapausing adults in cocoons (Mauerbienen®,  
154 Germany), and released at the nesting site at the University of Hull in April 2017. Nesting  
155 material consisted of Styrofoam blocks (Styrodur 3035 CS), with a 9x9mm furrow and  
156 polycarbonate lid, housed within a wooden frame (modified from Strohm et al., 2002); Fig.



157 S1a,b). Completed nests, signified by a mud plug at the entrance, were then brought into the  
158 laboratory. Early trials revealed that fresh eggs and newly emerged larvae were too fragile for  
159 manipulation. Therefore, newly emerged larvae were left alone for two days before we  
160 transferred them to a single-occupancy nest and assigned each to an experimental treatment.

161 The majority of nests were filled before the larvae hatched. When this was not the case,  
162 any larva reaching the two-day-post-hatching stage was removed at the nest site and placed into  
163 a single-occupancy nest.

164

#### 165 *Diet Formulation & Treatments*

166 We used the Geometric Framework of Nutrition (Simpson and Raubenheimer, 2012a),  
167 as described above, to investigate the intake target and rule of compromise employed by  
168 *O. bicornis* larvae. In the no-choice treatment, larvae were restricted to one of six separate diets at  
169 three different protein:carbohydrate (P:C) ratios (Diet A = 1:1.2, Diet B = 1:2.3 & Diet C =  
170 1:3.4) at two concentrations (90% or 70%, see table S1 for amounts of macronutrients). To our  
171 knowledge there is no precedent for the composition of artificial pollen diets for larval solitary  
172 bees, so these diet ratios were chosen based on a combination of the nutrient ratios in honeybee-  
173 collected pollen loads and published data for protein in *O. bicornis* pollen balls (Budde and  
174 Lunau, 2007). All diets contained an equal amount of honeybee-collected pollen and honey to  
175 which was added specific amounts of protein (micellar casein) and carbohydrate (trehalose),  
176 creating differing P:C ratios. The two diet concentrations were achieved by adding sporopollenin  
177 (see S1 for protocol), a major component of the outer wall of pollen considered largely  
178 indigestible by bees (Nepi et al., 2005; Roulston and Cane, 2000a; Suárez-Cervera et al., 1994).  
179 Sporopollenin was chosen rather than the more commonly used  $\alpha$ -cellulose (Lee et al., 2004a;

180 Muth et al., 2016; Pernal and Currie, 2002) as (1) initial trials showed high larval mortality when  
181 fed  $\alpha$ -cellulose, and (2) sporopollenin more closely resembled the natural fibre found in larval  
182 bees' diet, and is indigestible (Roulston and Cane, 2000a).

183 In the choice treatment, larvae were provided with two alternating diets (A [1:1.2] and C  
184 [1:3.4]) each of which was at one of two possible concentrations (90% or 70%; see Fig. 1),  
185 together forming 4 separate treatment groups. Because *O. bicornis* larvae are sedentary, it is  
186 biologically inappropriate to allow access to both diets simultaneously (Chambers et al., 1995;  
187 Shik et al., 2014; VanOverbeke et al., 2017). Therefore, choice was offered temporally by  
188 swapping the provision every other day, allowing the larvae to differentially feed over the course  
189 of the experiment. All larvae were kept on the same treatment from two days post-hatching up to  
190 pupation, whereupon diet replenishment ceased and cocoons were weighed..

191

#### 192 *Experiment 1: No-choice phase*

193 Two day old larvae, of mixed parentage, were randomly allocated to one of 6 treatments,  
194 corresponding to our 6 artificial diets (n = 20/group). The larva was removed from its natal nest  
195 onto a scoop within a single-occupancy nest containing one of the diets. The scoop was used to  
196 facilitate removal of food material and prevent the food from soiling the nest block. The single-  
197 occupancy nest, scoop and provision were weighed prior to use. The nest was then weighed  
198 (OHAUS Pioneer, PA-213) when containing the scoop, with the scoop and the provision, and  
199 then finally with the larva added to the provision. This ensured that the weights of all individual  
200 components could be separated, allowing for the monitoring of provision consumption. Initial  
201 provision weight was not tightly controlled as the diets were provided in excess (i.e. regularly  
202 replenished), but were made to resemble the size of natural provisions.

203           Once provisioned, larvae were placed in an incubation chamber (Gallenkamp, IH-270) at  
204   23°C and 80% RH. Provisions were replaced weekly, to avoid desiccation and mould formation,  
205   or when fully consumed by larvae. Weight of provision consumed was recorded upon provision  
206   replacement. Control larvae underwent the same manipulation but were supplied with natural  
207   provisions, i.e. a pollen ball from a cell containing an experimental larva whose pollen ball had  
208   been removed. Should they finish this provision, it was replenished with a fresh pollen ball,  
209   making the simplifying assumption that all parentally provided provisions were of equal  
210   composition. A “water control” group, containing pollen provisions but no larvae, was used to  
211   track water loss from the diets, going through the same weighing regime as above with weight  
212   loss recorded at each swap.

213           Nests were checked daily to ensure the health of the larvae. Final provision consumption  
214   was calculated once larvae had pupated by summing consumption across diet changes. Protein  
215   and carbohydrate consumed by each larva across the course of the experiment was then back-  
216   calculated from the final provision consumption. Cocoon weight was also recorded at the  
217   completion of pupation.

218

### 219   *Experiment 2: Choice phase*

220           Larvae received two diets, presented one at a time, in alternating order. 36 two-day-old  
221   larvae of mixed parentage were randomly divided among four complementary diet pairings  
222   consisting of the 1:1.2 and 1:3.4 P:C diets at the 70% and 90% concentration. Larvae were  
223   randomly assigned which diet within their pair they would be fed first. The paired diets were  
224   designed so that larvae would need to differentially feed from each in order to converge on an  
225   intake target. An additional group were assigned as controls and underwent the same

226 manipulation protocol but were fed natural provisions. Performance criteria were recorded as in  
227 Experiment 1. Total provision consumption per larva was calculated by summing the  
228 consumption of each of the paired diets across the duration of the experiment, and macronutrient  
229 consumption was back-calculated as for Experiment 1.

230

### 231 *Statistical Analysis*

232 All analyses were conducted in R version 3.4.2 (R Core Team, 2017). For the no-choice  
233 experiment, raw diet consumption data were first adjusted for water loss and dilution, and then  
234 total nutrient content (P and C) calculated from adjusted figures based on the known nutrient  
235 percentages in the dry diets. Values were then summed for each larva and plotted onto nutritional  
236 space. Response surfaces were calculated for cocoon weight and visualised using non-parametric  
237 thin-plate splines. Larvae that died pre-pupation were not used in the calculation of the mean P  
238 and C consumption for diets in either experiment, but were used in analyses involving survival.

239 In the choice experiment, mean final consumption of each nutrient was investigated using  
240 linear models with diet combination, dilution and their interaction as predictors. The minimal  
241 model was determined using reverse stepwise model selection and pairwise differences among  
242 groups were examined using Tukey's Post Hoc tests. We additionally tested whether larvae were  
243 exercising a choice at all, i.e. whether they were consuming the available diets non-randomly.  
244 We calculated the expected protein and carbohydrate that would be consumed under random  
245 consumption of each diet by assigning exactly half the total amount of food consumed by each  
246 larva to each of the two choices offered to that larva. We then re-ran our models, using "random  
247 vs. observed consumption" as a predictor variable.

248

249

## 250 **Results**

### 251 *No-choice phase*

252         Dietary P:C ratio had a strong effect on the total amount of P eaten (linear model using  
253 P:C ratio and diet concentration as predictors, dropping the main effect of ratio,  $F=74.16$ ,  
254  $p<0.0001$ ,  $df=2, 81$ ). P was eaten approximately in accordance with its proportion in the diet  
255 (Fig. 2a). Controls, on average, ate similar amounts of P as the C1 & C2 treatments (i.e. the  
256 lowest P:C ratio diets) (table S2), although this is tentative as the provisions were not directly  
257 analysed for their nutrient content, having instead been calculated using published values for *O.*  
258 *bicornis* pollen ball protein levels (Budde and Lunau, 2007). Diet concentration had no effect on  
259 amount of P consumed (linear model, dropping main effect of concentration,  $F=1.85$ ,  $p=0.18$ ,  
260  $df=1, 79$ ) and neither was there a diet:ratio interaction ( $F=<0.01$ ,  $p=0.99$ ,  $df=2, 78$ ). In contrast,  
261 neither concentration nor dietary P:C ratio had an influence on the amount of C consumed (linear  
262 model dropping interactions and main effects of P:C ratio and concentration, all NS; minimal  
263 model contained no terms). C was consumed to similar levels across all diets (Fig. 1). When we  
264 included the controls into the analysis, controls ate very slightly less C than the experimental  
265 treatments (linear model,  $F=4.07$ ,  $p=0.01$ ,  $df=6, 94$ ; Fig. 1). All ANOVA models showed a good  
266 fit.

267         Both the amount of protein and the amount of carbohydrate consumed were associated  
268 with cocoon weight (linear model using protein and carbohydrate as predictors, dropping the  
269 main effect of protein,  $F= 12.44$ ,  $p<0.001$ ,  $df=1, 76$ , and the main effect of carbohydrate,  $F =$   
270  $29.28$ ,  $p<0.001$ ,  $df=1, 76$ ). Higher amounts of protein resulted in lower cocoon weights whereas  
271 higher amounts of carbohydrate resulted in higher cocoon weights (Fig. 3). The linear model

272 showed a good fit. Note that no non-linear effects were observed, that is, we did not identify an  
273 optimal amount of protein or carbohydrate that maximised cocoon weight.

274 Diet also influenced the survival of larvae, with those held on the more dilute diets  
275 suffering greater mortality (parametric survival regression,  $\chi^2=72.7$ ,  $df=6$ ,  $p<0.0001$ , Fig. 4).  
276 When analysed according to amounts of carbohydrate and protein actually consumed, survival  
277 depended upon the interaction of carbohydrate with protein ( $\chi^2=4.88$ ,  $df=1$ ,  $p=0.02$ ). Those  
278 larvae that consumed high amounts of carbohydrate saw the lowest mortality irrespective of how  
279 much protein was consumed. At lower levels of carbohydrate however, mortality increased with  
280 decreasing amounts of protein (Fig. 5).

281

#### 282 *Choice phase*

283 If, as predicted, larvae regulate their nutrient consumption, we would expect to see no  
284 difference among diet treatments in the total P and C eaten. This was not the case (Fig. 6a) and  
285 so no single identifiable intake target could be detected. The amount of protein consumed by  
286 larvae during the choice experiment was significantly affected by diet combination (linear model  
287 using diet combination as a predictor, dropping the main effect of diet combination,  $F= 7.43$ ,  
288  $p=0.0016$ ,  $df=3, 23$ ) with more protein consumed in those diet combinations that contained the  
289 more concentrated diets (Tukey's Post Hoc tests; A2C2-A1C2,  $p=0.015$ ; A1C1-A2C1,  $p=0.019$ ;  
290 A2C2-A1C1,  $p=0.0031$ ). Similar results were seen for carbohydrate, with consumption being  
291 significantly affected by diet combination ( $F= 4.58$ ,  $p=0.013$ ,  $df=3, 23$ ). However, unlike with  
292 protein, this appeared to be driven solely by the diets at the extreme, with significantly more  
293 carbohydrate being eaten only by those in the most concentrated diet pair compared to the least

294 concentrated pair (Tukey's Post Hoc test; C2A2-C1A1,  $p=0.016$ ). Other pairwise comparisons of  
295 diet treatments were not significant.

296 Despite not converging upon an intake target in nutritional space, larvae were  
297 nevertheless not consuming the diets at random, instead seeming to align on a P:C ratio of about  
298 1:1.8 (Fig. 6a). For both carbohydrate and protein we saw differences in consumption from what  
299 would have been expected for each larva based on random consumption, and this effect was  
300 dependent on the specific set of diet choices (carbohydrate: linear mixed models with ID as a  
301 random effect and "diet combination" and "random or observed" as predictor variables; dropping  
302 the interaction,  $\chi^2=42.76$ ,  $df=3$ ,  $p<0.0001$ ; protein: dropping the interaction,  $\chi^2=16.91$ ,  $df=3$ ,  
303  $p<0.001$ , Fig. 7).

304 Moreover, when visualised as the amounts of P and C consumed during each 48h  
305 treatment period (Fig. 7a, b), it is clear that larvae were achieving a degree of homeostasis in C  
306 consumption compared to what would be expected under random consumption of each diet  
307 choice (Fig. 7c, Fig. 7d). In contrast, their consumption of P aligned very closely with what  
308 would be expected under random consumption (Fig. 7).

309

## 310 **Discussion**

311 When fed a diet with a fixed protein:carbohydrate ratio, larval *Osmia bicornis* pupated  
312 after eating a particular amount of carbohydrate, irrespective of whether they over- or under-ate  
313 protein, i.e. they exhibited a no-interaction rule (de Carvalho and Mirth, 2017). Although we did  
314 not identify an optimal intake amount for either nutrient, carbohydrate was positively associated  
315 with both cocoon weight and survival, and at low carbohydrate levels, survival instead became  
316 dependent on protein. When larvae were given a choice of complementary foods, they partially

317 adjusted their intake of each food to compensate for the variation in nutrient content. In this  
318 choice phase, although consumption of both protein and carbohydrate differed significantly from  
319 expected based on random consumption of each diet choice, larvae did not converge on an intake  
320 target as expected. Nevertheless, larvae converged on a common P:C ratio of approx. 1:1.8, and  
321 showed tighter control over carbohydrate consumption than over protein consumption, adding  
322 weight to the findings from the no-choice phase that suggest that *O.bicornis* larvae prioritise  
323 carbohydrate over protein consumption. Here we argue that overwintering and the regulation of  
324 the typically limiting nutrient may explain these findings.

325         Within the range of diets studied, cocoon weight was positively related to carbohydrate  
326 consumed, with little influence of protein (Fig. 3). Increased body size is related to the size of  
327 nutrient stores in *Osmia* (Bosch et al., 2010) and other insects (Briegel, 1990; Hahn, 2005;  
328 Strohm, 2000) - and may reflect the size of the fat body, where carbohydrate-derived fat is stored  
329 in insects (Arrese and Soulages, 2010). The fat body is critically important to species such as *O.*  
330 *bicornis* that undergo diapause - not only during diapause (Giejdasz and Wasielewski, 2017;  
331 Wasielewski et al., 2013) but also afterwards (Hahn and Denlinger, 2007). It would now be  
332 interesting to determine the specific relationships between larval nutrition and fat body size,  
333 overwintering success and subsequent fitness in *O. bicornis*. It is also important to note that  
334 increased body size may have several other benefits, e.g. larger females may be more robust to  
335 changeable weather conditions (Bosch, 2008; Bosch and Vicens, 2005). Whilst carbohydrate-  
336 biased (and protein-poor) intake targets have traditionally been seen as detrimental to female  
337 fitness (Lee et al., 2008), lipid is a key component in insect oocytes, comprising 30-40% of the  
338 dry weight (Kawooya and Law, 1988; Ziegler and Van Antwerpen, 2006) of which the vast  
339 majority comes from the fat body reserves of the female (Arrese and Soulages, 2010). Female *O.*



340 *bicornis* may therefore prioritise carbohydrate intake in order to provide adequate lipid stores to  
341 meet energy demands of their developing eggs (Beenackers et al., 1985). Nevertheless, (Bosch  
342 and Vicens, 2005) found little correlation between body size in *O.cornuta* and fecundity, which  
343 was instead more related to longevity and provisioning rate. It is also worth noting that although  
344 we found that high carbohydrate increased cocoon weight we did not identify a fitness peak at  
345 which cocoon weight was maximised. Further work could employ a wider range of diet ratios in  
346 order to locate this.

347         Dietary macronutrients also had noticeable effects on survival to pupation within our  
348 range of diets (Figs. 5, 6): the larvae consuming most carbohydrate had the greatest survival  
349 rates. Among *adult* insects, high carbohydrate (or more specifically, low P:C ratio) has often  
350 been associated with increased lifespan (Fanson et al., 2009; Le Couteur et al., 2016; Lee et al.,  
351 2008), including in both honeybee and bumblebee adults (Paoli et al., 2014a; Pirk et al., 2010;  
352 Stabler et al., 2015). Conversely, high P:C ratios have been linked to reduced lifespan in the  
353 adults of many insects (Dussutour and Simpson, 2012; Lee, 2015; Lee et al., 2008). Focusing on  
354 larvae, we saw somewhat different survival patterns with respect to protein consumption.  
355 Although high-carbohydrate consumption increased survival to pupation, among those larvae  
356 that ended up eating low quantities of carbohydrate, *protein* consumption mediated survival, with  
357 those on higher protein diets (higher P:C) experiencing greater survival (Fig. 5). This pattern  
358 may be driven by alternative mechanisms for surviving diapause. Well-fed larvae that have eaten  
359 sufficient carbohydrate may survive the winter via lipogenesis of carbohydrate-derived fat body  
360 reserves (Arrese and Soulages, 2010). However, if carbohydrates are limited, larvae may instead  
361 utilise dietary protein in order to provide lipid stores via deamination and gluconeogenesis of  
362 amino acids, as in some caterpillars (Lee et al., 2003, 2002; Merckx-Jacques et al., 2008).

363 Interestingly, in the only other study to have used the GF to investigate nutrition in larval bees, in  
364 this case honeybees (Helm et al., 2017), precisely the opposite effect was found. *In vitro* feeding  
365 revealed that, at high carbohydrate, larval survival was dependent on the amount of dietary  
366 protein, but at low carbohydrate survival was independent of protein. Larvae showed  
367 significantly reduced survival on high carbohydrate, low protein diets and the highest growth  
368 rates on diets that contained a medium level of protein but low carbohydrate - suggesting that  
369 worker recruitment could suffer in situations where protein is limited (Helm et al., 2017). The  
370 reasons behind this stark difference are unclear but it is worth noting that honeybee workers have  
371 a different role as adults from individuals of *O.bicornis*; all female *O.bicornis* are destined to be  
372 reproductives, unlike the honeybee larvae in Helm et al's study. Additionally, the honeybee  
373 larvae used in Helm et al's study were 'summer bees' (Steinmann et al., 2015) and therefore  
374 would not need to accrue nutrient reserves in order to enter diapause over the winter. If nothing  
375 else, these contrasting findings highlight not only the importance of understanding larval *as well*  
376 *as* adult nutrition for our general understanding of bee health, but also that knowledge of the  
377 nutritional ecology of more commonly studied social species cannot necessarily be applied to the  
378 more numerous, mass-provisioning solitary bees that collectively provide the bulk of our  
379 pollination services (Winfree et al., 2007).

380 Interestingly, when allowed to self-select their diets, *O.bicornis* larvae did not cluster in  
381 nutritional space but were instead spread out along a P:C ratio of 1:1.8 (Fig. 6a), approximately  
382 according to overall diet concentration. Notwithstanding the variable amounts actually eaten,  
383 assuming at least that this 1:1.8 *ratio* reflects the ratio of the larvae's true intake target, this  
384 would differ markedly from that reported for adult honeybees (1:12; Altaye et al., 2010), and  
385 would lie closer to that of ants foraging for offspring (1:1.5; Dussutour and Simpson, 2009).

386 Unlike sterile adult honeybees, all *O.bicornis* larvae are destined to be reproductive, and do not  
387 require fuel for immediate flight, so might be expected to require more protein. Unlike larval  
388 ants, however, *O.bicornis* larvae need to compile enough stores to survive winter diapause  
389 (Fliszkiewicz et al., 2012) so may require higher amounts of carbohydrate. The fact that we did  
390 not observe the expected clustering in nutrient space could potentially be explained by the fact  
391 that the more dilute diets contained more indigestible pollen husks (Roulston and Cane, 2000a),  
392 increasing the proportion of indigestible material passing through the gut. Some insects may be  
393 volumetrically limited when consuming dilute foods (Lee et al., 2008), so the additional fibrous  
394 material may have effectively limited the ability of bee larvae to regulate their diet by  
395 compensatory feeding. This may also explain why, although on average larvae ate more of the  
396 dilute diets on no-choice treatments (Fig. 2b), they were clearly unable to compensate for the  
397 reduced nutrient concentration, consuming less of each macronutrient than larvae fed more  
398 concentrated diets (Fig. 2a). Despite the fact that total food consumption was similar across  
399 treatments in the choice phase (Fig. 6b), larvae on less concentrated diets may have been unable  
400 to reach the same point in nutritional space due to consumption rate limitations.

401 The apparent lack of protein regulation shown by *O.bicornis* larvae is perhaps surprising  
402 given that, (1) the opposite is seen in larvae of other insects e.g. *Drosophila* flies (de Carvalho  
403 and Mirth, 2017) and *Helio virescens* caterpillars (Telang et al., 2001), (2) protein is important  
404 for somatic growth and survival (Lee, 2007; Povey et al., 2009; Roulston and Cane, 2002; Tasei  
405 and Aupinel, 2008), (3) bees primarily receive their protein (and lipid) requirements from pollen  
406 (Vaudo et al., 2016), and (4) larval bees feed primarily on pollen (Muth et al., 2016). Although  
407 adult workers of social bees have also been shown to prioritise carbohydrate over protein, their  
408 need for protein is relatively low (Paoli et al., 2014b; Stabler et al., 2015), requiring large

409 amounts of carbohydrate to fuel flight (Darveau et al., 2014) and their high metabolism (Harrison  
410 and Roberts, 2000). Considering that growth is concentrated in the larval stage, it would seem  
411 reasonable to expect that protein acquisition would drive nutritional decisions in larval bees,  
412 even if not adults.

413 Tolerance of wide variation in dietary protein, such as we saw in *O. bicornis* larvae, is  
414 typically seen in predators - both vertebrates, e.g. cats (Hewson-Hughes et al., 2011) and mink  
415 (Mayntz et al., 2009), and invertebrates (Kohl et al., 2015; Raubenheimer et al., 2007). However,  
416 bees are considered herbivorous (Larkin et al., 2008); herbivores tend to have protein-based  
417 decision rules, including pollen-foraging adult bumblebees (Vaudo et al., 2016) and many other  
418 herbivores [e.g. caterpillars (Lee et al., 2002; VanOverbeke et al., 2017)] and also omnivores  
419 [e.g. humans (Simpson and Raubenheimer, 2005)]. While clearly not predators, bees do share a  
420 common ancestor with predatory social wasps and ants (Johnson et al., 2013; Peters et al., 2011),  
421 and ant workers have been shown to tolerate varying protein levels in favour of a carbohydrate  
422 target (Dussutour and Simpson, 2009). Furthermore, “nutrient-generalist” species (i.e. those  
423 which tolerate wide ranges of dietary compositions) tend to be more able to tolerate swings in the  
424 particular nutrient which is least limiting (Raubenheimer and Simpson, 1999; Simpson and  
425 Raubenheimer, 2012b). Larval bees feed on pollen, which is amongst the most protein-rich of  
426 plant tissues (Mattson, 1980), and, as such, carbohydrate may be the more limiting nutrient for  
427 larvae. It is likely that starch, the standard form of digestible carbohydrate storage in pollen  
428 (Pacini, 1996), rarely exceeds the protein content of pollen; (Roulston and Buchmann, 2000)  
429 found that average starch content of pollen ranged from 0-22%, considerably less than the range  
430 for protein (2-60%; Roulston and Cane, 2000a). Thus, the relative abundance of protein in pollen

431 may help to explain why *O.bicornis* larvae appeared to eat to a carbohydrate target whilst  
432 tolerating varying levels of protein.

433         The fact that larvae consumed very different amounts of protein, despite its importance to  
434 larval insects, suggests that bee larvae may be vulnerable to environmental variations in the  
435 protein:carbohydrate ratio of pollen - in a similar but opposite manner to humans, who will  
436 consume excesses of carbohydrate in order to eat enough protein, rendering them vulnerable to  
437 variation in protein:carbohydrate ratio of food (Simpson and Raubenheimer, 2005). Since bee  
438 larvae appear to be able to regulate carbohydrate, they may therefore rely on parents to regulate  
439 protein on their behalf. Given the natural variation in pollen protein content in the environment,  
440 bee parents may be able to sense the macronutrient composition of pollen directly at the flower  
441 and thus actively regulate the composition of pollen provisions they provide to offspring. Some  
442 studies support this idea (Muth et al., 2016; Ruedenauer et al., 2016, 2015), yet many studies  
443 have found otherwise (Konzmann and Lunau, 2014; Roulston and Cane, 2002; Roulston and  
444 Cane, 2000b; for review, see Nicholls and Hempel de Ibarra, 2016). Conceivably, though, adults  
445 may instead simply collect pollen for young indiscriminately, relying on (1) larval tolerance of  
446 varying protein (this study), which may carry costs unmeasured here, and (2) variation in pollen  
447 quality balancing out owing to the historically rich diversity of the floral environment  
448 (Bukovinszky et al., 2017). In modern agricultural landscapes, where floral diversity is reduced  
449 in favour of brief gluts of monotonous crops, this strategy may no longer be effective and may  
450 indeed be deleterious. Under this scenario, the ways larvae deal with excesses and deficiencies of  
451 protein would be of paramount importance for bee health. With few exceptions (see Helm et al.,  
452 2017), we know very little about larval nutrition in bees as most studies focus on adults, whether  
453 foraging for nectar (Altaye et al., 2010; Kriesell et al., 2017; Paoli et al., 2014a; Ruedenauer et

454 al., 2015; Vaudo et al., 2016) or pollen (Altaye et al., 2010; Kriesell et al., 2017; Paoli et al.,  
455 2014a; Ruedenauer et al., 2015; Vaudo et al., 2016). Considering that (1) all the nutrients  
456 required to reach adulthood are accrued during the larval stage, and (2) larvae and adults have  
457 different nutritional requirements (Cridge et al., 2017), the way larval bees deal with  
458 macronutrient imbalances is a considerable knowledge gap. In particular, further studies that  
459 assess whether *O.bicornis* larvae employ post-ingestive processing to regulate protein intake, as  
460 shown in some other insects (Lee et al., 2004a; Raubenheimer and Simpson, 2003; Rho and Lee,  
461 2017; Telang et al., 2001), may help to explain the large variation of protein tolerated by larvae.

462 That (1) larvae seem not to regulate protein, (2) parents are likely unable to assess protein  
463 content for their young, and (3) human activity, particularly intensive agriculture, is reducing  
464 floral diversity, potentially make for a toxic combination for bees. Changes to the composition of  
465 available nutrition, driven by loss of floral diversity (Goulson et al., 2015), or potentially through  
466 changes in the nutritional composition of pollen *within* a plant species in response to human  
467 activity (Ziska et al., 2016), may cause mother bees to unwittingly feed their offspring nutrient-  
468 deficient diets. This would mean that, despite otherwise favourable environments, *O.bicornis* and  
469 possibly bees more generally, would become caught in a “nutritional trap”, gathering food that  
470 no longer provides offspring with appropriate nutrition. More research is needed into the  
471 nutrition of larval bees, especially solitary species where knowledge is sparse, in order to inform  
472 conservation management and stewardship schemes. Further studies should focus on whether  
473 larval bees have physiological adaptations to overcome nutrient imbalances, e.g. post-ingestive  
474 processing, and whether mother bees are able to adjust the provisions they provide their  
475 offspring in order to counter changing nutritional composition of pollen available in the  
476 environment.

477

## 478 **References**

- 479 Altaye, S.Z., Pirk, C.W.W., Crewe, R.M., Nicolson, S.W., 2010. Convergence of carbohydrate-  
480 biased intake targets in caged worker honeybees fed different protein sources. *J. Exp.*  
481 *Biol.* 213, 3311–3318.
- 482 Archer, C.R., Pirk, C.W.W., Wright, G.A., Nicolson, S.W., 2014. Nutrition affects survival in  
483 African honeybees exposed to interacting stressors. *Funct. Ecol.* 28, 913–923.
- 484 Arganda, S., Nicolis, S.C., Perochain, A., Péchabadens, C., Latil, G., Dussutour, A., 2014.  
485 Collective choice in ants: The role of protein and carbohydrates ratios. *J. Insect Physiol.*  
486 69, 19–26.
- 487 Arrese, E.L., Soulagés, J.L., 2010. Insect fat body: energy, metabolism, and regulation. *Annu.*  
488 *Rev. Entomol.* 55, 207–225.
- 489 Beenackers, A.M., Van der Horst, D.J., Van Marrewijk, W.J., 1985. Insect lipids and  
490 lipoproteins, and their role in physiological processes. *Prog. Lipid Res.* 24, 19–67.
- 491 Behmer, S.T., 2009. Insect herbivore nutrient regulation. *Annu. Rev. Entomol.* 54, 165–187.
- 492 Bosch, J., 2008. Production of undersized offspring in a solitary bee. *Anim. Behav.* 75, 809–  
493 816.
- 494 Bosch, J., Sgolastra, F., Kemp, W.P., 2010. Timing of eclosion affects diapause development,  
495 fat body consumption and longevity in *Osmia lignaria*, a univoltine, adult-wintering  
496 solitary bee. *J. Insect Physiol.* 56, 1949–1957.
- 497 Bosch, J., Vicens, N., 2005. Relationship between body size, provisioning rate, longevity and  
498 reproductive success in females of the solitary bee *Osmia cornuta*. *Behav. Ecol.*  
499 *Sociobiol.* 60, 26–33.
- 500 Briegel, H., 1990. Metabolic relationship between female body size, reserves, and fecundity  
501 of *Aedes aegypti*. *J. Insect Physiol.* 36, 165–172.
- 502 Budde, J., Lunau, K., 2007. Rezepte für ein Pollenbrot--heute: *Osmia rufa*. *Entomologie*  
503 *heute* 19, 173–179.
- 504 Bukovinszky, T., Rikken, I., Evers, S., Wäckers, F.L., Biesmeijer, J.C., Prins, H.H.T., Kleijn, D.,  
505 2017. Effects of pollen species composition on the foraging behaviour and offspring  
506 performance of the mason bee *Osmia bicornis* (L.). *Basic Appl. Ecol.* 18, 21–30.
- 507 Cane, J.H., 2016. Adult Pollen Diet Essential for Egg Maturation by a Solitary *Osmia* Bee. *J.*  
508 *Insect Physiol.*
- 509 Chambers, P.G., Simpson, S.J., Raubenheimer, D., 1995. Behavioural mechanisms of nutrient  
510 balancing in *Locusta migratoria* nymphs. *Anim. Behav.* 50, 1513–1523.
- 511 Chapman, R.F., Chapman, R.F., 1998. *The Insects: Structure and Function*. Cambridge  
512 University Press.
- 513 Clissold, F.J., Simpson, S.J., 2015. Temperature, food quality and life history traits of  
514 herbivorous insects. *Current Opinion in Insect Science* 11, 63–70.
- 515 Cridge, A., Harrop, T., Lovegrove, M., Remnant, E., Dearden, P., 2017. Nutrition and  
516 Epigenetic Change in Insects: Evidence and Implications. In: *Advances in Insect*  
517 *Physiology*. Academic Press.
- 518 Darveau, C.-A., Billardon, F., Bélanger, K., 2014. Intraspecific variation in flight metabolic  
519 rate in the bumblebee *Bombus impatiens*: repeatability and functional determinants in  
520 workers and drones. *J. Exp. Biol.* 217, 536–544.
- 521 de Carvalho, M.J.A., Mirth, C.K., 2017. Food intake and food choice are altered by the

- 522 developmental transition at critical weight in *Drosophila melanogaster*. *Anim. Behav.*  
523 126, 195–208.
- 524 Dussutour, A., Simpson, S.J., 2008. Carbohydrate regulation in relation to colony growth in  
525 ants. *J. Exp. Biol.* 211, 2224–2232.
- 526 Dussutour, A., Simpson, S.J., 2009. Communal nutrition in ants. *Curr. Biol.* 19, 740–744.
- 527 Dussutour, A., Simpson, S.J., 2012. Ant workers die young and colonies collapse when fed a  
528 high-protein diet. *Proc. Biol. Sci.* 279, 2402–2408.
- 529 Falk, S.J., 2015. Field guide to the bees of Great Britain and Ireland. British Wildlife  
530 Publishing.
- 531 Fanson, B.G., Weldon, C.W., Pérez-Staples, D., Simpson, S.J., Taylor, P.W., 2009. Nutrients,  
532 not caloric restriction, extend lifespan in Queensland fruit flies (*Bactrocera tryoni*).  
533 *Aging Cell* 8, 514–523.
- 534 Field, J., 2005. The evolution of progressive provisioning. *Behav. Ecol.*
- 535 Fliszkiewicz, M., Giejdasz, K., Wasielewski, O., Krishnan, N., 2012. Influence of winter  
536 temperature and simulated climate change on body mass and fat body depletion  
537 during diapause in adults of the solitary bee, *Osmia rufa* (Hymenoptera: Megachilidae).  
538 *Environ. Entomol.* 41, 1621–1630.
- 539 Giejdasz, K., Wasielewski, O., 2017. Effect of Artificial Prolonged Wintering on Emergence  
540 and Survival of *Osmia Rufa* Adults. *Journal of Apicultural Science* 61.
- 541 Goulson, D., Nicholls, E., 2016. The canary in the coalmine; bee declines as an indicator of  
542 environmental health. *Sci. Prog.* 99, 312–326.
- 543 Goulson, D., Nicholls, E., Botías, C., Rotheray, E.L., 2015. Bee declines driven by combined  
544 stress from parasites, pesticides, and lack of flowers. *Science* 347, 1255957.
- 545 Hahn, D.A., 2005. Larval nutrition affects lipid storage and growth, but not protein or  
546 carbohydrate storage in newly eclosed adults of the grasshopper *Schistocerca*  
547 *americana*. *J. Insect Physiol.* 51, 1210–1219.
- 548 Hahn, D.A., Denlinger, D.L., 2007. Meeting the energetic demands of insect diapause:  
549 nutrient storage and utilization. *J. Insect Physiol.* 53, 760–773.
- 550 Harrison, J.F., Roberts, S.P., 2000. Flight respiration and energetics. *Annu. Rev. Physiol.* 62,  
551 179–205.
- 552 Hayes, J., Jr, Underwood, R.M., Pettis, J., Others, 2008. A survey of honey bee colony losses in  
553 the US, fall 2007 to spring 2008. *PLoS One* 3, e4071.
- 554 Helm, B.R., Slater, G.P., Rajamohan, A., Yocum, G.D., Greenlee, K.J., Bowsher, J.H., 2017. The  
555 geometric framework for nutrition reveals interactions between protein and  
556 carbohydrate during larval growth in honey bees. *Biol. Open* 6, 872–880.
- 557 Hendriksma, H.P., Shafir, S., 2016. Honey bee foragers balance colony nutritional  
558 deficiencies. *Behav. Ecol. Sociobiol.* 70, 509–517.
- 559 Hewson-Hughes, A.K., Hewson-Hughes, V.L., Miller, A.T., Hall, S.R., Simpson, S.J.,  
560 Raubenheimer, D., 2011. Geometric analysis of macronutrient selection in the adult  
561 domestic cat, *Felis catus*. *J. Exp. Biol.* 214, 1039–1051.
- 562 Huang, Z., 2012. Pollen nutrition affects honey bee stress resistance. *Terr. Arthropod Rev.* 5,  
563 175–189.
- 564 Jauker, F., Bondarenko, B., Becker, H.C., Steffan-Dewenter, I., 2012. Pollination efficiency of  
565 wild bees and hoverflies provided to oilseed rape. *Agric. For. Entomol.* 14, 81–87.
- 566 Jensen, K., Mayntz, D., Toft, S., Clissold, F.J., Hunt, J., Raubenheimer, D., Simpson, S.J., 2012.  
567 Optimal foraging for specific nutrients in predatory beetles. *Proc. Biol. Sci.* 279, 2212–



- 568 2218.
- 569 Johnson, B.R., Borowiec, M.L., Chiu, J.C., Lee, E.K., Atallah, J., Ward, P.S., 2013. Phylogenomics  
570 resolves evolutionary relationships among ants, bees, and wasps. *Curr. Biol.* 23, 2058–  
571 2062.
- 572 Kawooya, J.K., Law, J.H., 1988. Role of lipophorin in lipid transport to the insect egg. *J. Biol.*  
573 *Chem.* 263, 8748–8753.
- 574 Klein, A.-M., Boreux, V., Fornoff, F., Mupepele, A.-C., Pufal, G., 2018. Relevance of wild and  
575 managed bees for human well-being. *Current Opinion in Insect Science*.
- 576 Klein, A.-M., Vaissière, B.E., Cane, J.H., Steffan-Dewenter, I., Cunningham, S.A., Kremen, C.,  
577 Tschardtke, T., 2007. Importance of pollinators in changing landscapes for world  
578 crops. *Proc. Biol. Sci.* 274, 303–313.
- 579 Kohl, K.D., Coogan, S.C.P., Raubenheimer, D., 2015. Do wild carnivores forage for prey or for  
580 nutrients? *Bioessays* 37, 701–709.
- 581 Konzmann, S., Lunau, K., 2014. Divergent rules for pollen and nectar foraging bumblebees--  
582 a laboratory study with artificial flowers offering diluted nectar substitute and pollen  
583 surrogate. *PLoS One* 9, e91900.
- 584 Kriesell, L., Hilpert, A., Leonhardt, S.D., 2017. Different but the same: bumblebee species  
585 collect pollen of different plant sources but similar amino acid profiles. *Apidologie* 48,  
586 102–116.
- 587 Larkin, L.L., Neff, J.L., Simpson, B.B., 2008. The evolution of a pollen diet: host choice and  
588 diet breadth of *Andrena* bees (Hymenoptera: Andrenidae). *Apidologie* 39, 133–145.
- 589 Le Couteur, D.G., Solon-Biet, S., Cogger, V.C., Mitchell, S.J., Senior, A., de Cabo, R.,  
590 Raubenheimer, D., Simpson, S.J., 2016. The impact of low-protein high-carbohydrate  
591 diets on aging and lifespan. *Cell. Mol. Life Sci.* 73, 1237–1252.
- 592 Lee, K.P., 2007. The interactive effects of protein quality and macronutrient imbalance on  
593 nutrient balancing in an insect herbivore. *J. Exp. Biol.* 210, 3236–3244.
- 594 Lee, K.P., 2015. Dietary protein:carbohydrate balance is a critical modulator of lifespan and  
595 reproduction in *Drosophila melanogaster*: a test using a chemically defined diet. *J.*  
596 *Insect Physiol.* 75, 12–19.
- 597 Lee, K.P., Behmer, S.T., Simpson, S.J., Raubenheimer, D., 2002. A geometric analysis of  
598 nutrient regulation in the generalist caterpillar *Spodoptera littoralis* (Boisduval). *J.*  
599 *Insect Physiol.* 48, 655–665.
- 600 Lee, K.P., Raubenheimer, D., Behmer, S.T., Simpson, S.J., 2003. A correlation between  
601 macronutrient balancing and insect host-plant range: evidence from the specialist  
602 caterpillar *Spodoptera exempta* (Walker). *J. Insect Physiol.* 49, 1161–1171.
- 603 Lee, K.P., Raubenheimer, D., Simpson, S.J., 2004a. The effects of nutritional imbalance on  
604 compensatory feeding for cellulose-mediated dietary dilution in a generalist  
605 caterpillar. *Physiol. Entomol.* 29, 108–117.
- 606 Lee, K.P., Simpson, S.J., Clissold, F.J., Brooks, R., Ballard, J.W.O., Taylor, P.W., Soran, N.,  
607 Raubenheimer, D., 2008. Lifespan and reproduction in *Drosophila*: New insights from  
608 nutritional geometry. *Proc. Natl. Acad. Sci. U. S. A.* 105, 2498–2503.
- 609 Lee, K.P., Simpson, S.J., Raubenheimer, D., 2004b. A comparison of nutrient regulation  
610 between solitary and gregarious phases of the specialist caterpillar, *Spodoptera*  
611 *exempta* (Walker). *J. Insect Physiol.* 50, 1171–1180.
- 612 Letourneau, D.K., Armbricht, I., Rivera, B.S., Lerma, J.M., Carmona, E.J., Daza, M.C., Escobar,  
613 S., Galindo, V., Gutiérrez, C., López, S.D., Mejía, J.L., Rangel, A.M.A., Rangel, J.H., Rivera, L.,

- 614 Saavedra, C.A., Torres, A.M., Trujillo, A.R., 2011. Does plant diversity benefit  
615 agroecosystems? A synthetic review. *Ecol. Appl.* 21, 9–21.
- 616 Mattson, W.J., 1980. Herbivory in Relation to Plant Nitrogen Content. *Annu. Rev. Ecol. Syst.*  
617 11, 119–161.
- 618 Mayntz, D., Nielsen, V.H., Sørensen, A., Toft, S., 2009. Balancing of protein and lipid intake by  
619 a mammalian carnivore, the mink, *Mustela vison*. *Anim. Behav.*
- 620 Merckx-Jacques, M., Despland, E., Bede, J.C., 2008. Nutrient utilization by caterpillars of the  
621 generalist beet armyworm, *Spodoptera exigua*. *Physiol. Entomol.* 33, 51–61.
- 622 Muth, F., Francis, J.S., Leonard, A.S., 2016. Bees use the taste of pollen to determine which  
623 flowers to visit. *Biol. Lett.* 12.
- 624 Nepi, M., Cresti, L., Maccagnani, B., Ladurner, E., Pacini, E., 2005. From the anther to the  
625 proctodeum: Pear (*Pyrus communis*) pollen digestion in *Osmia cornuta* larvae. *J. Insect*  
626 *Physiol.* 51, 749–757.
- 627 Nicholls, E., Hempel de Ibarra, N., 2016. Assessment of pollen rewards by foraging bees.  
628 *Funct. Ecol.*
- 629 Nijhout, H.F., Riddiford, L.M., Mirth, C., Shingleton, A.W., Suzuki, Y., Callier, V., 2014. The  
630 developmental control of size in insects. *Wiley Interdiscip. Rev. Dev. Biol.* 3, 113–134.
- 631 Ollerton, J., Erenler, H., Edwards, M., Crockett, R., 2014. Pollinator declines. Extinctions of  
632 aculeate pollinators in Britain and the role of large-scale agricultural changes. *Science*  
633 346, 1360–1362.
- 634 Ollerton, J., Winfree, R., Tarrant, S., 2011. How many flowering plants are pollinated by  
635 animals? *Oikos*.
- 636 Pacini, E., 1996. Types and meaning of pollen carbohydrate reserves. *Sex. Plant Reprod.* 9,  
637 362.
- 638 Paoli, P.P., Donley, D., Stabler, D., Saseendranath, A., Nicolson, S.W., Simpson, S.J., Wright,  
639 G.A., 2014a. Nutritional balance of essential amino acids and carbohydrates of the  
640 adult worker honeybee depends on age. *Amino Acids* 46, 1449–1458.
- 641 Paoli, P.P., Wakeling, L.A., Wright, G.A., Ford, D., 2014b. The dietary proportion of essential  
642 amino acids and Sir2 influence lifespan in the honeybee. *Age* 36, 9649.
- 643 Pernal, S.F., Currie, R.W., 2002. Discrimination and preferences for pollen-based cues by  
644 foraging honeybees, *Apis mellifera* L. *Anim. Behav.* 63, 369–390.
- 645 Peters, R.S., Meyer, B., Krogmann, L., Borner, J., Meusemann, K., Schütte, K., Niehuis, O.,  
646 Misof, B., 2011. The taming of an impossible child: a standardized all-in approach to  
647 the phylogeny of Hymenoptera using public database sequences. *BMC Biol.* 9, 55.
- 648 Pirk, C.W.W., Boodhoo, C., Human, H., Nicolson, S.W., 2010. The importance of protein type  
649 and protein to carbohydrate ratio for survival and ovarian activation of caged  
650 honeybees (*Apis mellifera scutellata*). *Apidologie* 41, 62–72.
- 651 Poggio, S.L., Chaneton, E.J., Ghersa, C.M., 2013. The arable plant diversity of intensively  
652 managed farmland: Effects of field position and crop type at local and landscape scales.  
653 *Agric. Ecosyst. Environ.* 166, 55–64.
- 654 Potts, S.G., Imperatriz-Fonseca, V., Ngo, H.T., Aizen, M.A., Biesmeijer, J.C., Breeze, T.D., Dicks,  
655 L.V., Garibaldi, L.A., Hill, R., Settele, J., Vanbergen, A.J., 2016. Safeguarding pollinators  
656 and their values to human well-being. *Nature*.
- 657 Potts, S.G., Roberts, S.P.M., Dean, R., Marris, G., Brown, M.A., Jones, R., Neumann, P., Settele,  
658 J., 2010. Declines of managed honey bees and beekeepers in Europe. *J. Apic. Res.* 49,  
659 15–22.

- 660 Povey, S., Cotter, S.C., Simpson, S.J., Lee, K.P., Wilson, K., 2009. Can the protein costs of  
661 bacterial resistance be offset by altered feeding behaviour? *J. Anim. Ecol.* 78, 437–446.
- 662 Raubenheimer, D., Mayntz, D., Simpson, S.J., Tøft, S., 2007. Nutrient-specific compensation  
663 following diapause in a predator: implications for intraguild predation. *Ecology*.
- 664 Raubenheimer, D., Simpson, S.J., 1999. Integrating nutrition: a geometrical approach. In:  
665 Proceedings of the 10th International Symposium on Insect-Plant Relationships, Series  
666 Entomologica. Springer Netherlands, pp. 67–82.
- 667 Raubenheimer, D., Simpson, S.J., 2003. Nutrient balancing in grasshoppers: behavioural and  
668 physiological correlates of dietary breadth. *J. Exp. Biol.* 206, 1669–1681.
- 669 Rho, M.S., Lee, K.P., 2017. Temperature-driven plasticity in nutrient use and preference in  
670 an ectotherm. *Oecologia*.
- 671 Robertson, B.A., Rehage, J.S., Sih, A., 2013. Ecological novelty and the emergence of  
672 evolutionary traps. *Trends Ecol. Evol.* 28, 552–560.
- 673 Robinson, R.A., Sutherland, W.J., 2002. Post-war changes in arable farming and biodiversity  
674 in Great Britain. *J. Appl. Ecol.*
- 675 Roulston, T.H., Buchmann, S.L., 2000. A phylogenetic reconsideration of the pollen starch--  
676 pollination correlation. *Evol. Ecol. Res.* 2, 627–643.
- 677 Roulston, T.H., Cane, J.H., 2000a. Pollen nutritional content and digestibility for animals.  
678 *Plant Syst. Evol.* 222, 187–209.
- 679 Roulston, T.H., Cane, J.H., 2000b. The Effect of Diet Breadth and Nesting Ecology on Body  
680 Size Variation in Bees (Apiformes). *J. Kans. Entomol. Soc.* 73, 129–142.
- 681 Roulston, T.H., Cane, J.H., 2002. The effect of pollen protein concentration on body size in  
682 the sweat bee *Lasioglossum zephyrum* (Hymenoptera: Apiformes). *Evol. Ecol.* 16, 49–  
683 65.
- 684 Roulston, T.H., Goodell, K., 2011. The role of resources and risks in regulating wild bee  
685 populations. *Annu. Rev. Entomol.* 56, 293–312.
- 686 Ruedenauer, F.A., Spaethe, J., Leonhardt, S.D., 2015. How to know which food is good for  
687 you: bumblebees use taste to discriminate between different concentrations of food  
688 differing in nutrient content. *J. Exp. Biol.* 218, 2233–2240.
- 689 Ruedenauer, F.A., Spaethe, J., Leonhardt, S.D., 2016. Hungry for quality—individual  
690 bumblebees forage flexibly to collect high-quality pollen. *Behav. Ecol. Sociobiol.* 1–9.
- 691 Schulze, J., Oeschger, L., Gross, A., Mueller, A., Stoll, P., Erhardt, A., 2012. Solitary bees--  
692 Potential vectors for gene flow from cultivated to wild strawberries. *Flora-*  
693 *Morphology, Distribution, Functional Ecology of Plants* 207, 762–767.
- 694 Scriber, J.M., Slansky, F.J., 1981. The Nutritional Ecology of Immature Insects. *Annu.*  
695 *Rev. Entomol.* 26, 183–211.
- 696 Seidelmann, K., Ulbrich, K., Mielenz, N., 2010. Conditional sex allocation in the Red Mason  
697 bee, *Osmia rufa*. *Behav. Ecol. Sociobiol.* 64, 337–347.
- 698 Shik, J.Z., Gomez, E.B., Kooij, P.W., Santos, J.C., Wcislo, W.T., Boomsma, J.J., 2016. Nutrition  
699 mediates the expression of cultivar–farmer conflict in a fungus-growing ant.  
700 *Proceedings of the National Academy of Sciences*.
- 701 Shik, J.Z., Schal, C., Silverman, J., 2014. Diet specialization in an extreme omnivore:  
702 nutritional regulation in glucose-averse German cockroaches. *J. Evol. Biol.* 27, 2096–  
703 2105.
- 704 Simpson, S.J., Raubenheimer, D., 1993. A Multi-Level Analysis of Feeding Behaviour: The  
705 Geometry of Nutritional Decisions. *Philos. Trans. R. Soc. Lond. B Biol. Sci.* 342, 381–

- 706 402.
- 707 Simpson, S.J., Raubenheimer, D., 2001. The Geometric Analysis of Nutrient-Allelochemical  
708 Interactions: A Case Study Using Locusts. *Ecology* 82, 422–439.
- 709 Simpson, S.J., Raubenheimer, D., 2005. Obesity: the protein leverage hypothesis. *Obes. Rev.*  
710 6, 133–142.
- 711 Simpson, S.J., Raubenheimer, D., 2012a. The nature of nutrition: a unifying framework from  
712 animal adaptation to human obesity. Princeton University Press.
- 713 Simpson, S.J., Raubenheimer, D., 2012b. The nature of nutrition: a unifying framework.  
714 *Aust. J. Zool.* 59, 350–368.
- 715 Stabler, D., Paoli, P.P., Nicolson, S.W., Wright, G.A., 2015. Nutrient balancing of the adult  
716 worker bumblebee (*Bombus terrestris*) depends on the dietary source of essential  
717 amino acids. *J. Exp. Biol.* 218, 793–802.
- 718 Steinmann, N., Corona, M., Neumann, P., Dainat, B., 2015. Overwintering Is Associated with  
719 Reduced Expression of Immune Genes and Higher Susceptibility to Virus Infection in  
720 Honey Bees. *PLoS One* 10, e0129956.
- 721 Strohm, E., 2000. Factors affecting body size and fat content in a digger wasp. *Oecologia*  
722 123, 184–191.
- 723 Strohm, E., Daniels, H., Warmers, C., Stoll, C., 2002. Nest provisioning and a possible cost of  
724 reproduction in the megachilid bee *Osmia rufa* studied by a new observation method.  
725 *Ethol. Ecol. Evol.* 14, 255–268.
- 726 Suárez-Cervera, M., Marquez, J., Bosch, J., Seoane-Camba, J., 1994. An Ultrastructural Study  
727 of Pollen Grains Consumed by Larvae of *Osmia* Bees (Hymenoptera, Megachilidae).  
728 *Grana* 33, 191–204.
- 729 Tasei, J.-N., Aupinel, P., 2008. Nutritive value of 15 single pollens and pollen mixes tested on  
730 larvae produced by bumblebee workers (*Bombus terrestris*, Hymenoptera: Apidae).  
731 *Apidologie* 39, 397–409.
- 732 Telang, A., Booton, V., Chapman, R.F., Wheeler, D.E., 2001. How female caterpillars  
733 accumulate their nutrient reserves. *J. Insect Physiol.* 47, 1055–1064.
- 734 Vanderplanck, M., Moerman, R., Rasmont, P., Lognay, G., Wathelet, B., Wattiez, R., Michez, D.,  
735 2014. How does pollen chemistry impact development and feeding behaviour of  
736 polylectic bees? *PLoS One* 9, e86209.
- 737 VanOverbeke, D.R., Thompson, S.N., Redak, R.A., 2017. Dietary self-selection and rules of  
738 compromise by fifth-instar *Vanessa cardui*. *Entomol. Exp. Appl.* 163, 209–219.
- 739 Vaudo, A.D., Stabler, D., Patch, H.M., Tooker, J.F., Grozinger, C.M., Wright, G.A., 2016a.  
740 Bumble bees regulate their intake of essential protein and lipid pollen macronutrients.  
741 *J. Exp. Biol.* 219, 3962–3970.
- 742 Wasielewski, O., Wojciechowicz, T., Giejdasz, K., Krishnan, N., 2013. Overwintering  
743 strategies in the red mason solitary bee—physiological correlates of midgut metabolic  
744 activity and turnover of nutrient reserves in females of *Osmia bicornis*. *Apidologie* 44,  
745 642–656.
- 746 Winfree, R., Williams, N.M., Dushoff, J., Kremen, C., 2007. Native bees provide insurance  
747 against ongoing honey bee losses. *Ecol. Lett.* 10, 1105–1113.
- 748 Wood, T.J., Holland, J.M., Goulson, D., 2016. Providing foraging resources for solitary bees  
749 on farmland: current schemes for pollinators benefit a limited suite of species. *J. Appl.*  
750 *Ecol.*
- 751 Ziegler, R., Van Antwerpen, R., 2006. Lipid uptake by insect oocytes. *Insect Biochem. Mol.*

752 Biol. 36, 264–272.  
753 Ziska, L.H., Pettis, J.S., Edwards, J., Hancock, J.E., Tomecek, M.B., Clark, A., Dukes, J.S., Loladze,  
754 I., Polley, H.W., 2016. Rising atmospheric CO<sub>2</sub> is reducing the protein concentration of  
755 a floral pollen source essential for North American bees. Proc. Biol. Sci. 283.

756 **Tables & Figures**

757

758

759

760 **Table 1. Diet combinations used for choice phase.**

|             | Concentration 1 (90%) | Concentration 2 (70%) |
|-------------|-----------------------|-----------------------|
| P:C Ratio:  |                       |                       |
| A (1P:1.2C) | A1                    | A2                    |
| C (1P:3.3C) | C1                    | C2                    |

761

762

763

764 **Table 2. Sample sizes for each diet combination used for choice phase (allocated by random**

765 **coin toss). “Order” refers to diet order - e.g. for A1C1, Order 1 would receive A1 first**

766 **whereas Order 2 would receive C1 first. Surviving larvae are in parentheses.**

|      | Order 1 | Order 2 |
|------|---------|---------|
| A1C1 | 1 (1)   | 6 (5)   |
| A1C2 | 5 (5)   | 4 (3)   |
| A2C1 | 3 (2)   | 5 (5)   |
| A2C2 | 5 (2)   | 3 (1)   |

767

768

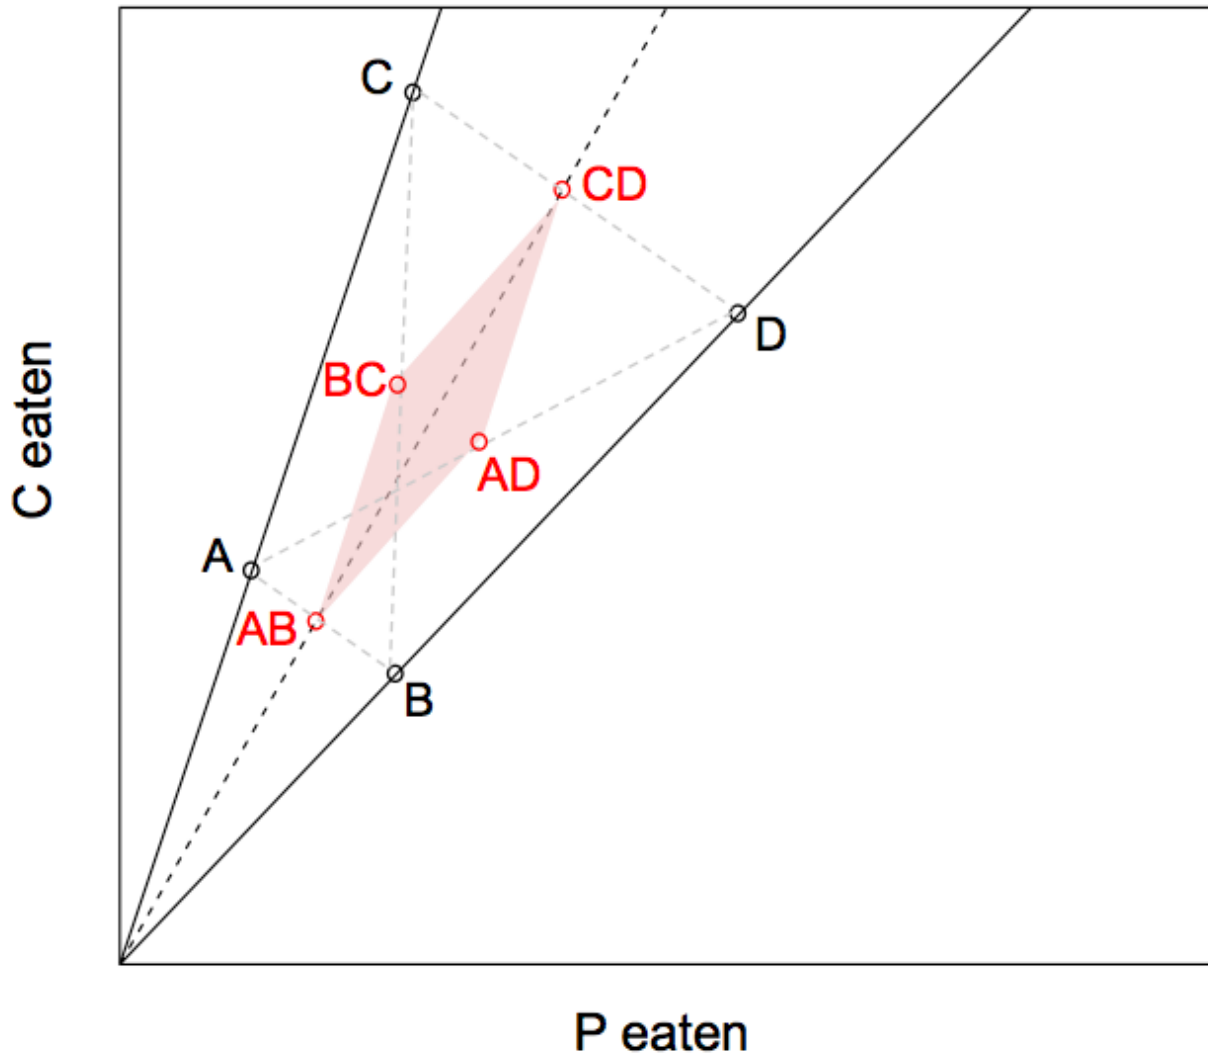

769  
770 **Fig 1. The expected amounts of protein and carbohydrate consumed if larvae**  
771 **hypothetically eat indiscriminately between two diets. Diet choices are pairwise**  
772 **combinations of diets A, B, C and D, which each contain protein and carbohydrate at**  
773 **different ratios and concentrations. Solid lines represent the P:C ratios of the individual**  
774 **diets; black points represent actual nutrient content of each diet, which depends upon**  
775 **dilution as well as P:C ratio. Red points represent the expected nutrient consumption if**  
776 **larvae eat randomly (i.e. equally) from each of a choice of two diets (choices denoted by the**

777 **red point labels). Note that random consumption patterns resemble a diamond shape**  
778 **surrounding the line that bisects the two rails.**



779

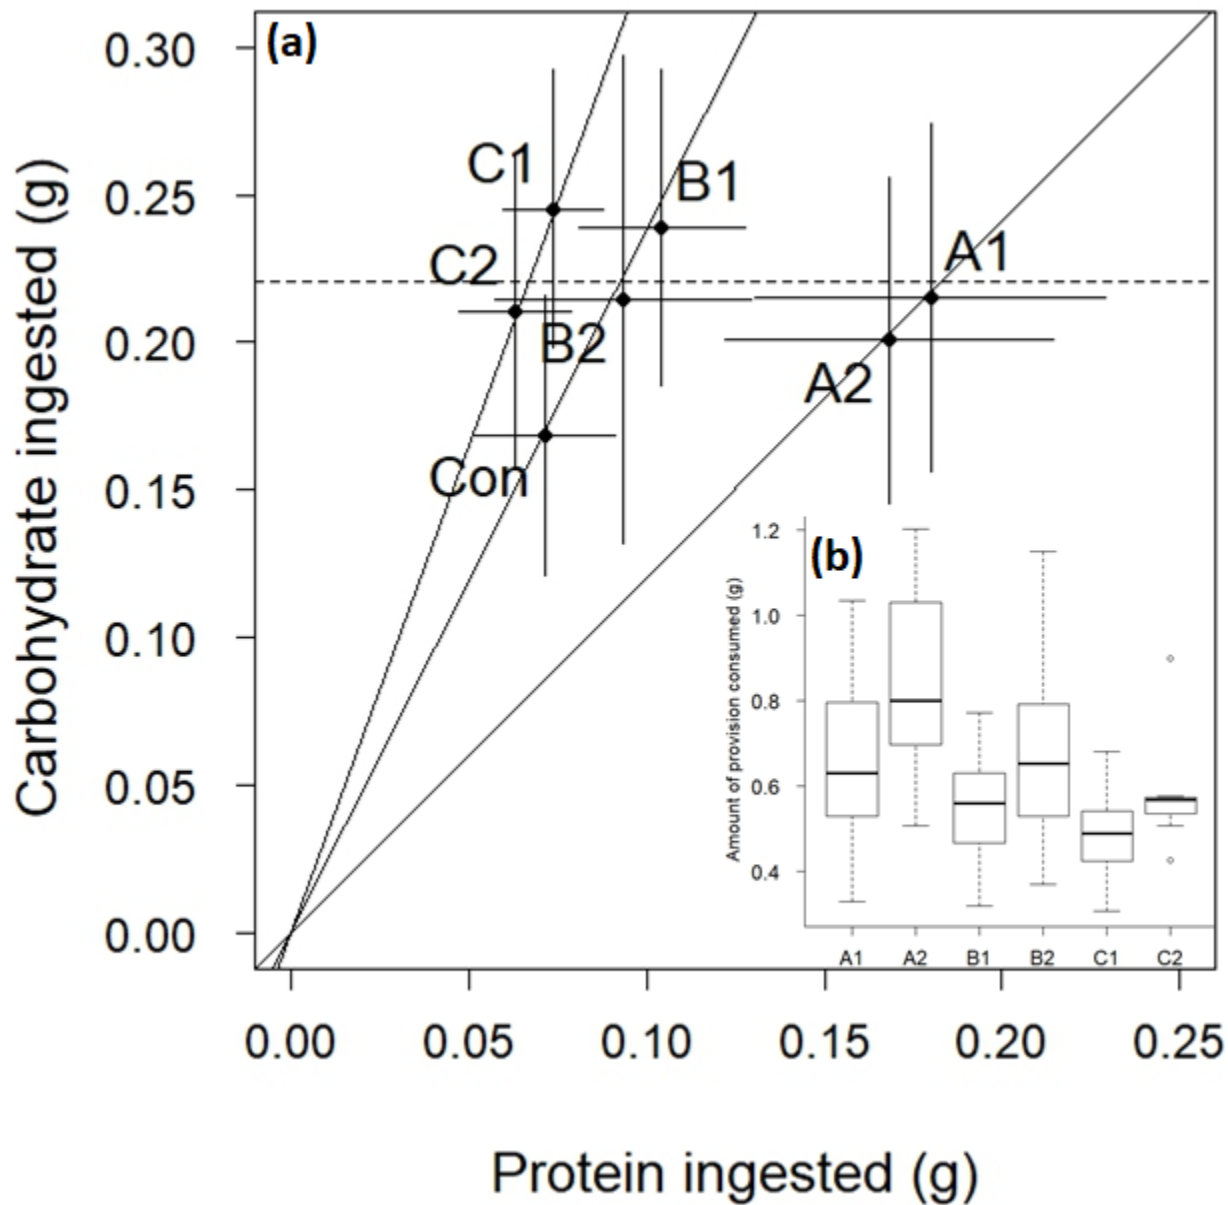

780

781 **Fig. 2. (a) Mean total (+/- 1 SD) amount of P and C consumed in grams by larvae on**  
782 **each diet across the duration of development. Solid lines and letters represent three**  
783 **P:C ratios (A = 1:1.2, B = 1:2.3, C = 1:3.4), 'Con' represents control group. Numbers**  
784 **following letters denote diet concentration (1 = 90%, 2 = 70%). (b) the total amount**  
785 **of raw provision consumed by each group, after water correction, in grams.**

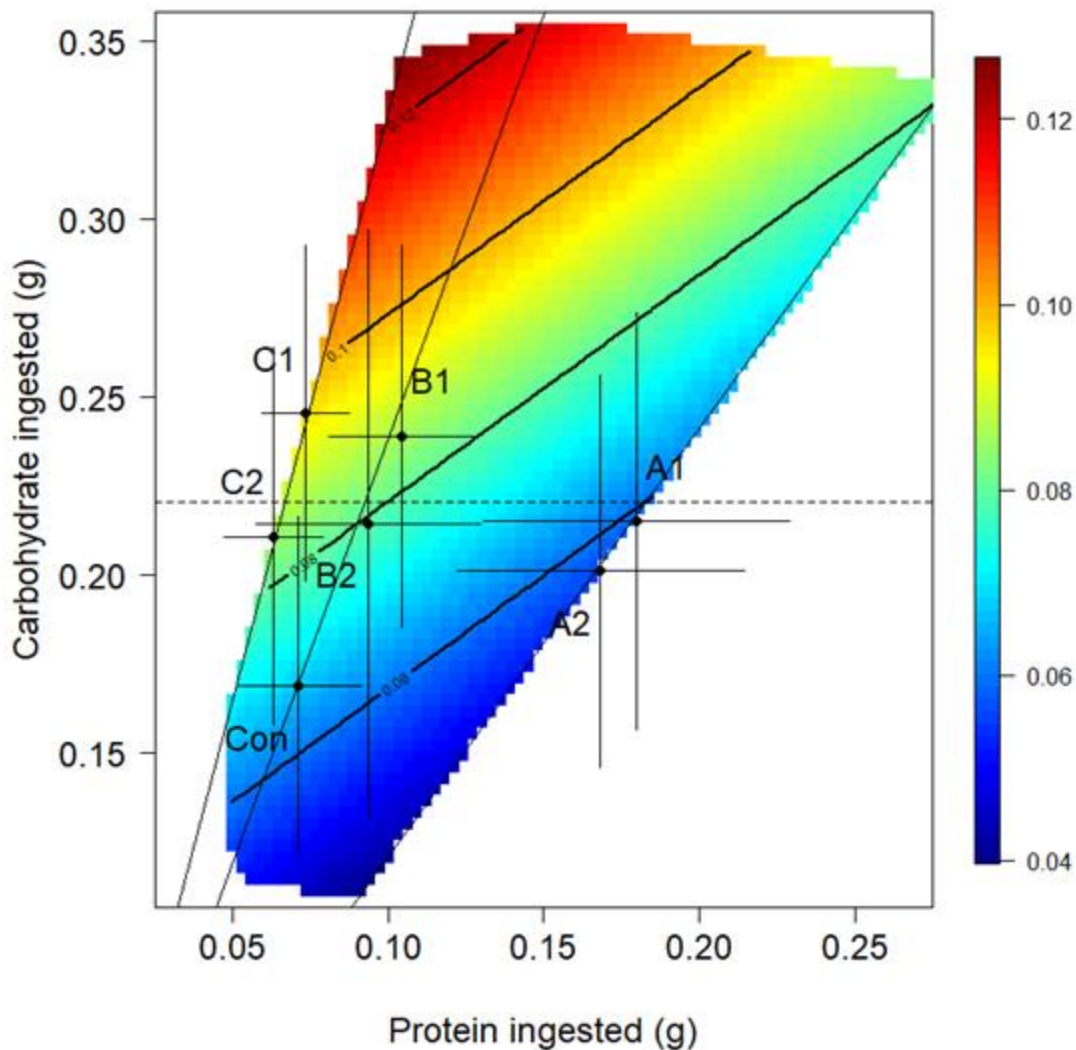

786

787 **Fig. 3. Response surface showing the effects of the amount of P and C consumed on**

788 **Cocoon weight (g). Transition from blue to red indicates heavier cocoons. For**

789 **context, mean total consumption of P and C for each diet is plotted (data as in Fig. 2).**

790 **Solid lines and letters represent three P:C ratios (A = 1:1.2, B = 1:2.3, C = 1:3.4), 'Con'**

791 **represents control group. Numbers following letters denote diet concentration (1 =**

792 **90%, 2 = 70%).**

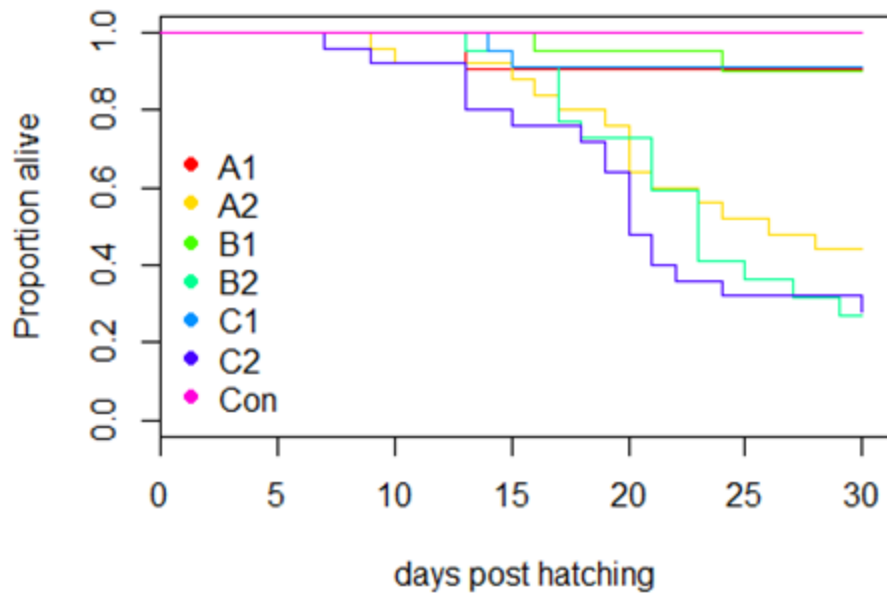

793

794 **Fig. 4. Survival of larvae on fixed diet treatments according to the diet they were fed**

795 **Letters represent three P:C ratios (A = 1:1.2, B = 1:2.3, C = 1:3.4), 'Con' represents**

796 **control group. Lines represent the proportion of larvae still alive at a given time**

797 **point. Numbers following letters denote diet concentration (1 = 90%, 2 = 70%).**

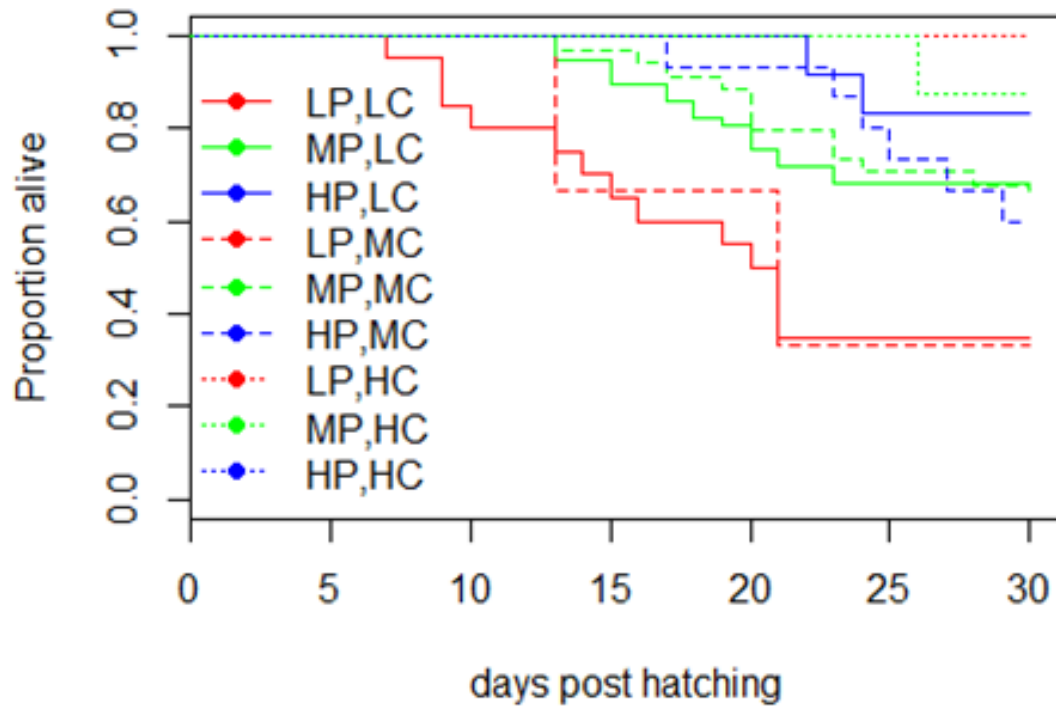

798

799 **Fig. 5. Survival of fixed-diet groups broken down by amounts of macronutrients**

800 **actually consumed. Lines represent the proportion of larvae alive at a given time**

801 **point. Key: P = protein, C = carbohydrate; H = high, M = medium, L = low consumption**

802 **(top, middle and bottom 33% of consumption, respectively)**

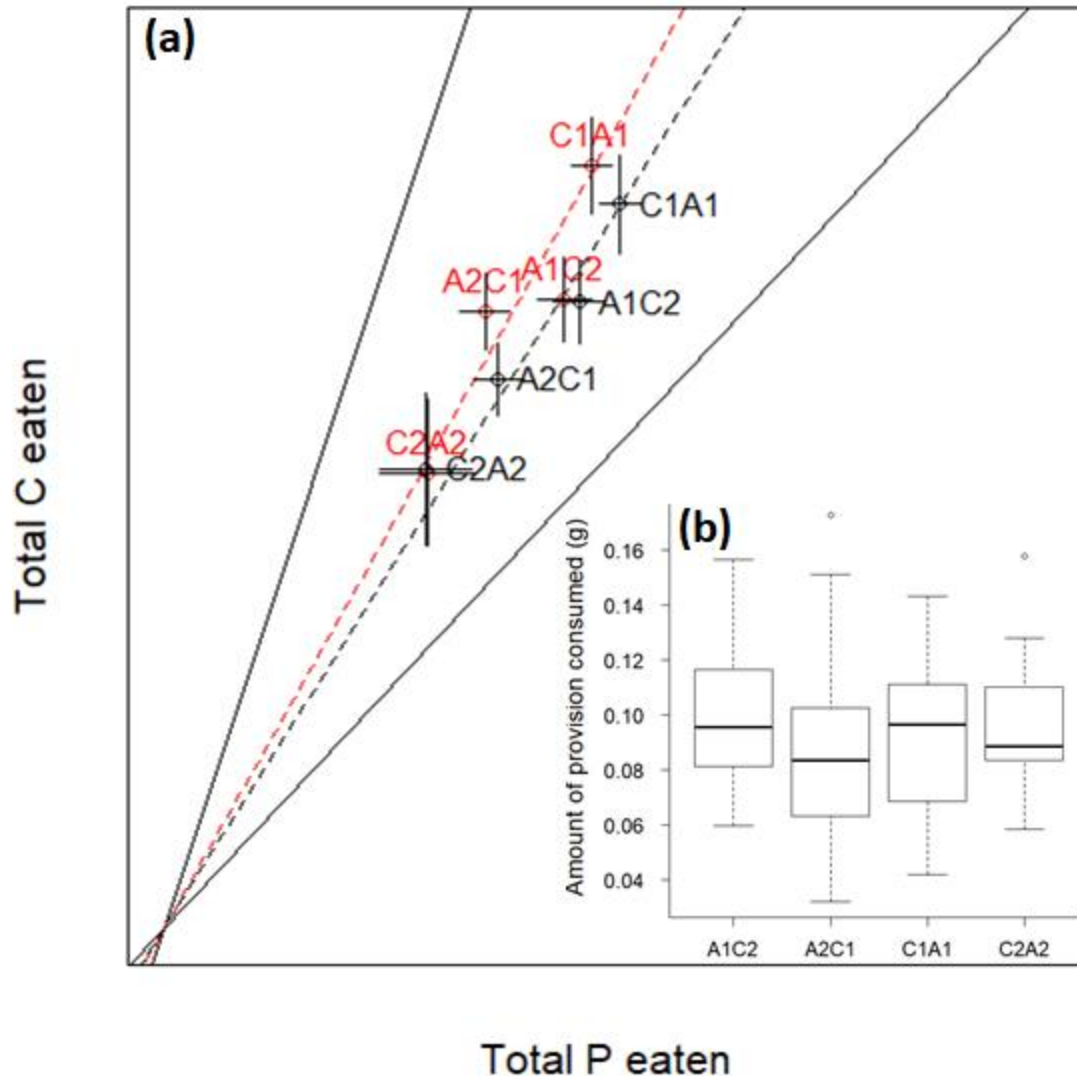

803  
804 **Fig. 6. (a) The mean total ( $\pm 1$  SE) amount of protein (P) and carbohydrate (C) eaten**  
805 **by larvae in the choice experiment. Each point label denotes a choice of two diets,**  
806 **one A and one C; black labels show observed intake, red labels show expected intake**  
807 **under random (i.e. equal) consumption. Letters in diet names represent two P:C**  
808 **ratios (A = 1:1.2, C = 1:3.4). Numbers in diet names (e.g. A1, A2) represent the**  
809 **concentration of each individual diet within a pairing (1 = 90%, 2 = 70%). Solid lines**  
810 **represent the P:C ratio of the individual diets within the pairings (Top line = Diet A,**  
811 **Bottom line = Diet C). Dashed red line shows the expected average P:C ratio for all**

812 **larvae, if the larvae eat randomly between the diets within their pairing (random).**  
813 **Dashed black line shows the P:C ratio to which the larvae conformed based on their**  
814 **observed intake. (b) The amount of raw provision consumed by each diet pairing,**  
815 **after water correction.**

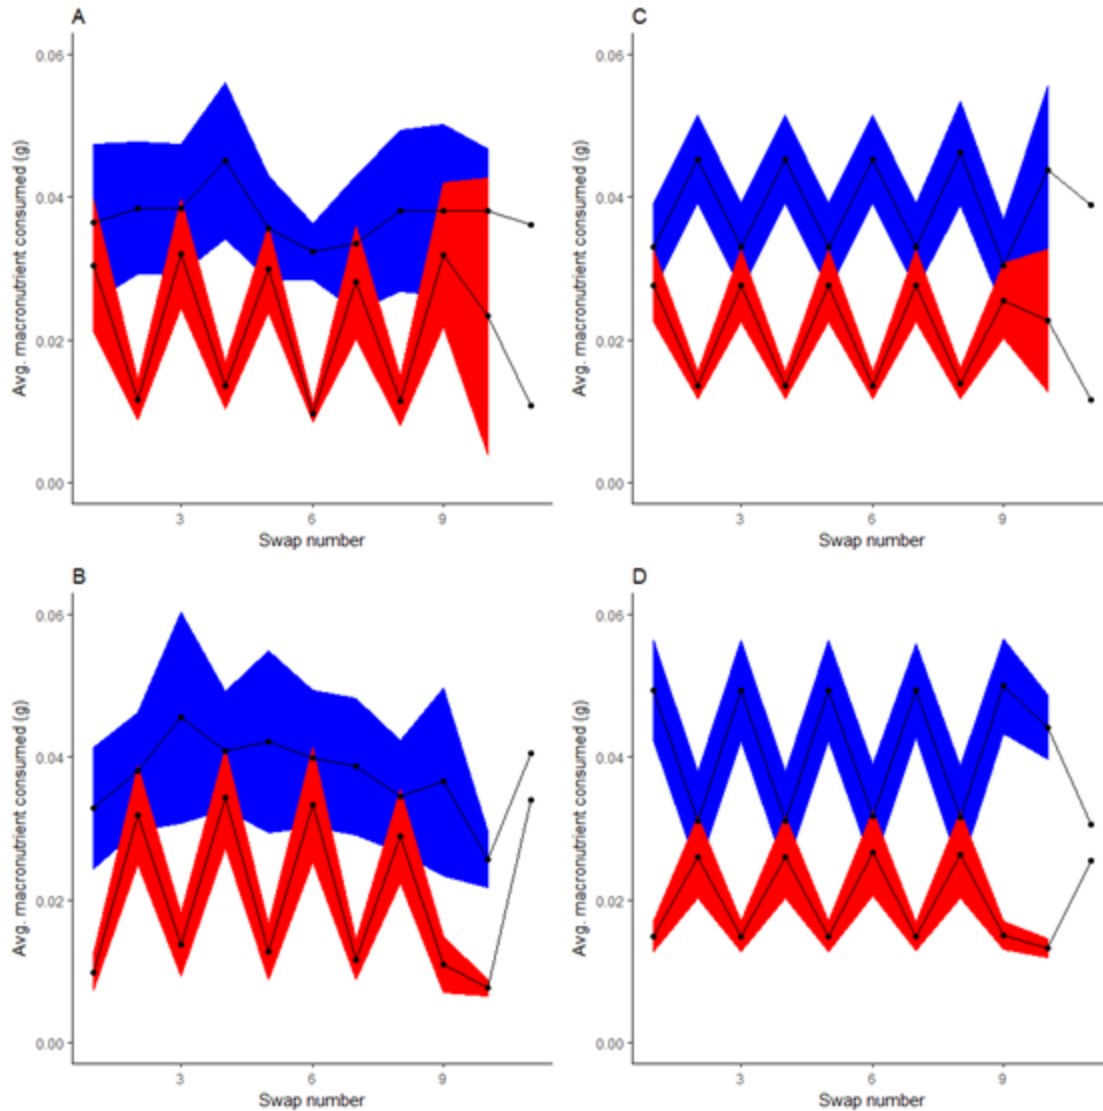

816

817 **Fig 7. Mean (+/- 1SD) intake of protein (red) and carbohydrate (blue) over**

818 **successive diet swaps for observed larval consumption (A & B), versus the expected**

819 **nutrient intake under random consumption of diets (C & D), irrespective of the**

820 **concentrations of the diet choices (for calculations of expected consumption, see**

821 **text). A & C show larvae starting on diet A, B & D show larvae starting on diet C.**
